# Supplementary material
Source: MDPI journal article supplement (https://www.mdpi.com/2073-4433/14/2/356)
Supplement: s1 [file s1]

# Modeling and Assessment of PM<sub>10</sub> and Atmospheric Metal Pollution in Kayseri Province, Turkey

Fatma Kunt <sup>1\*</sup>, Zeynep Cansu Ayturan <sup>2</sup>, Feray Yümün <sup>3</sup>, İlknur Karagönen <sup>3</sup>, Mümin Semerci <sup>3</sup>, Mehmet Akgün <sup>3</sup> and İbrahim Ceylan <sup>3</sup>

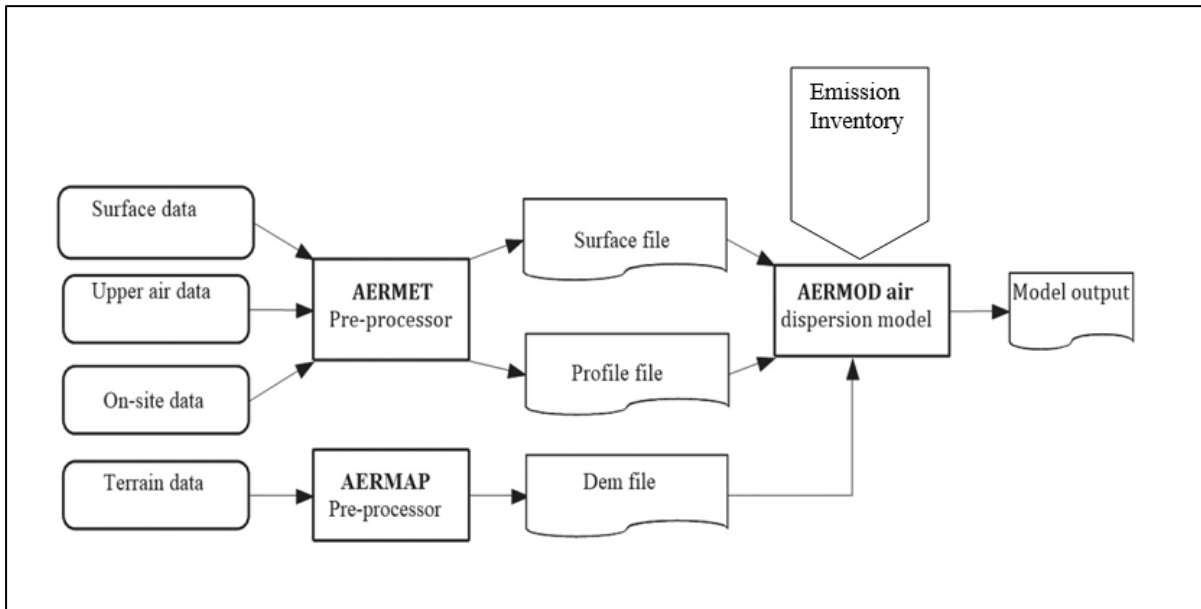

Figure S1. AERMOD data flow chart.

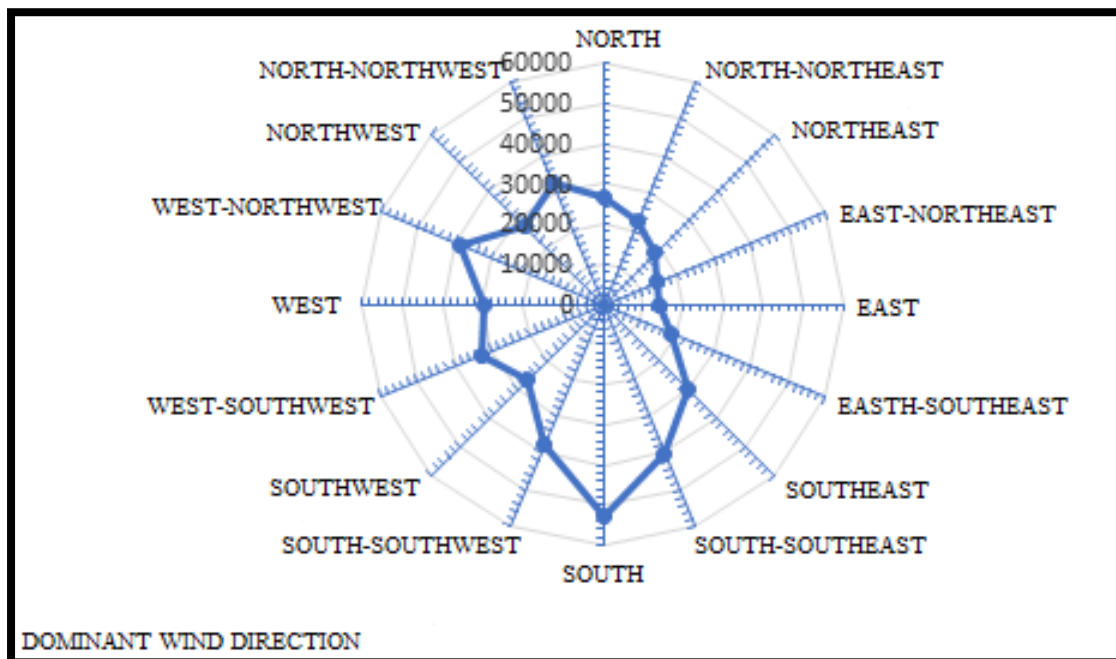

Figure S2. Wind rose showing dominant wind direction prepared from the meteorological data between 1960–2015.

**Table S1.** The points used in AERMOD scenarios and their sectors.

| Facility | Type  | ID           | Sector               | All Scenario | Scenario 1 | Scenario 2 |
|----------|-------|--------------|----------------------|--------------|------------|------------|
| 1        | Point | PATEKS       | Paper Recovery       | X            | X          |            |
| 2        | Point | BOYTAS       | Furniture            | X            | X          |            |
| 3        | Point | BOYTEKS      | Textile              | X            | X          |            |
| 4        | Point | ÇINKOM       | Zinc Production      | X            |            | X          |
| 5        | Point | SERSİM       | Machine Production   | X            | X          |            |
| 6        | Point | KAYDÖKSAN    | Casting              | X            | X          |            |
| 7        | Point | KAYSERISEKE1 | Sugar Production     | X            |            | X          |
|          | Point | KAYSERISEKE2 |                      | X            |            | X          |
|          | Point | KAYSERISEKE3 |                      | X            |            | X          |
| 8        | Point | DORUK        | Machine Production   | X            | X          |            |
| 9        | Point | ÇAGLAYAN     | Casting              | X            | X          |            |
| 10       | Point | FEMAŞ        | Machine Production   | X            | X          |            |
| 11       | Point | ŞIRIKOGLU    | Textile              | X            | X          |            |
| 12       | Point | SIMKA        | Casting              | X            | X          |            |
| 13       | Point | SOMCELİK     | Metal Working        | X            | X          |            |
| 14       | Point | MINISAN      | Household Appliances | X            | X          |            |
| 15       | Point | ERBOSAN      | Pipe Manufacturing   | X            | X          |            |
| 16       | Point | KUMTEL       | Household Appliances | X            | X          |            |
| 17       | Point | MESTAS       | Metal Working        | X            | X          |            |
| 18       | Point | REFORM       | Textile              | X            | X          |            |
| 19       | Point | HES          | Wire Production      | X            | X          |            |
| 20       | Point | BKBMOBİLYA   | Furniture            | X            | X          |            |

**Table S2.** Limit values for heavy metal pollution

| Pollutant | Averaging Period | Limit Value           |
|-----------|------------------|-----------------------|
| Lead      | 1 year           | 0.5 µg/m <sup>3</sup> |
| Nickel    | 1 year           | 20 ng/m <sup>3</sup>  |
| Arsenic   | 1 year           | 6 ng/m <sup>3</sup>   |
| Cadmium   | 1 year           | 5 ng/m <sup>3</sup>   |

**Table S3.** The PM10 emission rates (kg/h) for each point source.

| Facility | Type  | ID           | Sector               | PM <sub>10</sub> Emission Rates (kg/h) |
|----------|-------|--------------|----------------------|----------------------------------------|
| 1        | Point | PATEKS       | Paper Recovery       | 2.114856                               |
| 2        | Point | BOYTAS       | Furniture            | 0.10728                                |
| 3        | Point | BOYTEKS      | Textile              | 0.027468                               |
| 4        | Point | ÇINKOM       | Zinc Production      | 1.9584                                 |
| 5        | Point | SERSİM       | Machine Production   | 0.9252                                 |
| 6        | Point | KAYDÖKSAN    | Casting              | 0.7776                                 |
| 7        | Point | KAYSERISEKE1 | Sugar Production     | 0.054                                  |
|          | Point | KAYSERISEKE2 |                      | 0.0396                                 |
|          | Point | KAYSERISEKE3 |                      | 0.04176                                |
| 8        | Point | DORUK        | Machine Production   | 0.05868                                |
| 9        | Point | ÇAGLAYAN     | Casting              | 0.09                                   |
| 10       | Point | FEMAŞ        | Machine Production   | 0.414                                  |
| 11       | Point | ŞIRIKOGLU    | Textile              | 0.04068                                |
| 12       | Point | SIMKA        | Casting              | 0.315                                  |
| 13       | Point | SOMCELIK     | Metal Working        | 0.3636                                 |
| 14       | Point | MINISAN      | Household Appliances | 0.02556                                |
| 15       | Point | ERBOSAN      | Pipe Manufacturing   | 0.54                                   |
| 16       | Point | KUMTEL       | Household Appliances | 0.36                                   |
| 17       | Point | MESTAS       | Metal Working        | 0.0648                                 |
| 18       | Point | REFORM       | Textile              | 0.03276                                |
| 19       | Point | HES          | Wire Production      | 0.864                                  |
| 20       | Point | BKBMOBILYA   | Furniture            | 0.32868                                |

**Table S4.** Meteorology pathway of the AERMOD models

# Meteorology Pathway

AERI

## Met Input Data

### Surface Met Data

Filename: ..\kayserimet.SFC

Format Type: Default AERMET format

### Profile Met Data

Filename: ..\kayserimet.PFL

Format Type: Default AERMET format

### Wind Speed



Wind Speeds are Vector Mean (Not Scalar Means)

### Wind Direction

Rotation Adjustment [deg]:

### Potential Temperature Profile

Base Elevation above MSL (for Primary Met Tower): 10.00 [m]

### Meteorological Station Data

| Stations  | Station No. | Year | X Coordinate [m] | Y Coordinate [m] | Station Name                     |
|-----------|-------------|------|------------------|------------------|----------------------------------|
| Surface   |             | 2014 |                  |                  | ERKILET_LTAU_[Sinoptik]_[Metar]_ |
| Upper Air |             | 2014 |                  |                  | ERKILET_LTAU_[Sinoptik]_[Metar]_ |

## Data Period

### Data Period to Process

Start Date: 1/1/2014      Start Hour: 1      End Date: 12/31/2014      End Hour: 24

## Wind Speed Categories

| Stability Category | Wind Speed [m/s] | Stability Category | Wind Speed [m/s] |
|--------------------|------------------|--------------------|------------------|
| A                  | 1.54             | D                  | 8.23             |
| B                  | 3.09             | E                  | 10.8             |
| C                  | 5.14             | F                  | No Upper Bound   |
